# Supplementary material for: Uncovering the Pharmacological Mechanisms of Gexia-Zhuyu Formula (GXZY) in Treating Liver Cirrhosis by an Integrative Pharmacology Strategy
Source: Front Pharmacol. 2022 Mar 7;13:793888. doi: 10.3389/fphar.2022.793888 (PMC8940433; doi:10.3389/fphar.2022.793888)
Supplement: Supplementary file 2 [file Table3.XLSX]

## Sheet: Table S3
Table S3 The compounds of GXZY.
Molecule name	Canonical SMILES	Isomeric SMILES
beta-sitosterol	CCC(CCC(C)C1CCC2C1(CCC3C2CC=C4C3(CCC(C4)O)C)C)C(C)C	CC[C@H](CC[C@@H](C)[C@H]1CC[C@@H]2[C@@]1(CC[C@H]3[C@H]2CC=C4[C@@]3(CC[C@@H](C4)O)C)C)C(C)C
Stigmasterol	CCC(C=CC(C)C1CCC2C1(CCC3C2CC=C4C3(CCC(C4)O)C)C)C(C)C	CCC(C=CC(C)C1CCC2[C@@]1(CCC3C2CC=C4[C@@]3(CCC(C4)O)C)C)C(C)C
Mandenol	CCCCCC=CCC=CCCCCCCCC(=O)OCC	CCCCC/C=C\C/C=C\CCCCCCCC(=O)OCC
Myricanone	COC1=C2C=C(CCCCC(=O)CCC3=CC2=C(C=C3)O)C(=C1OC)O	-
Perlolyrine	C1=CC=C2C(=C1)C3=C(N2)C(=NC=C3)C4=CC=C(O4)CO	-
sitosterol	CCC(CCC(C)C1CCC2C1(CCC3C2CC=C4C3(CCC(C4)O)C)C)C(C)C	CC[C@H](CC[C@@H](C)[C@H]1CC[C@@H]2[C@@]1(CC[C@H]3[C@H]2CC=C4[C@@]3(CC[C@@H](C4)O)C)C)C(C)C
FA	C1=CC(=CC=C1C(=O)NC(CCC(=O)O)C(=O)O)NCC2=CN=C3C(=N2)C(=O)NC(=N3)N	C1=CC(=CC=C1C(=O)N[C@@H](CCC(=O)O)C(=O)O)NCC2=CN=C3C(=N2)C(=O)NC(=N3)N
Sitosterol alpha1	CC=C(CCC(C)C1CCC2C1(CCC3C2=CCC4C3(CCC(C4C)O)C)C)C(C)C	C/C=C(/CC[C@@H](C)[C@H]1CC[C@@H]2[C@@]1(CC[C@H]3C2=CC[C@@H]4[C@@]3(CC[C@@H]([C@H]4C)O)C)C)\C(C)C
gibberellin 17	CC1(CCCC2(C1C(C34C2CCC(C3)(C(=C)C4)O)C(=O)O)C(=O)O)C(=O)O	C[C@]1(CCC[C@@]2([C@@H]1[C@@H]([C@]34[C@H]2CC[C@](C3)(C(=C)C4)O)C(=O)O)C(=O)O)C(=O)O
4a-formyl-7alpha-hydroxy-1-methyl-8-methylidene-4aalpha,4bbeta-gibbane-1alpha,10beta-dicarboxylic acid	CC1(CCCC2(C1C(C34C2CCC(C3)(C(=C)C4)O)C(=O)O)C=O)C(=O)O	C[C@]1(CCC[C@@]2([C@@H]1[C@@H]([C@]34[C@H]2CC[C@](C3)(C(=C)C4)O)C(=O)O)C=O)C(=O)O
Gibberellin A44	CC12CCCC3(C1C(C45C3CCC(C4)(C(=C)C5)O)C(=O)O)COC2=O	C[C@@]12CCC[C@@]3([C@@H]1[C@@H]([C@]45[C@H]3CC[C@](C4)(C(=C)C5)O)C(=O)O)COC2=O
3-O-p-coumaroylquinic acid	C1C(C(C(CC1(C(=O)O)O)OC(=O)C=CC2=CC=C(C=C2)O)O)O	C1[C@H]([C@@H]([C@@H](C[C@]1(C(=O)O)O)OC(=O)/C=C/C2=CC=C(C=C2)O)O)O
Populoside_qt	C1=CC=C(C=C1)C(=O)OCC2C(C(C(C(O2)OC3=CC=CC=C3CO)O)O)O	-
hederagenin	CC1(CCC2(CCC3(C(=CCC4C3(CCC5C4(CCC(C5(C)CO)O)C)C)C2C1)C)C(=O)O)C	C[C@]12CC[C@@H]([C@@]([C@@H]1CC[C@@]3([C@@H]2CC=C4[C@]3(CC[C@@]5([C@H]4CC(CC5)(C)C)C(=O)O)C)C)(C)CO)O
campesterol	CC(C)C(C)CCC(C)C1CCC2C1(CCC3C2CC=C4C3(CCC(C4)O)C)C	C[C@H](CC[C@H](C)C(C)C)[C@H]1CC[C@@H]2[C@@]1(CC[C@@H]3[C@H]2CC=C4[C@@]3(CC[C@@H](C4)O)C)C
paeoniflorin_qt	CC12CC3(C4CC1(C4(C(O2)O3)COC(=O)C5=CC=CC=C5)OC6C(C(C(C(O6)CO)O)O)O)O	C[C@@]12C[C@@]3([C@@H]4C[C@]1([C@]4([C@H](O2)O3)COC(=O)C5=CC=CC=C5)O[C@H]6[C@@H]([C@H]([C@@H]([C@H](O6)CO)O)O)O)O
Mairin	CC(=C)C1CCC2(C1C3CCC4C5(CCC(C(C5CCC4(C3(CC2)C)C)(C)C)O)C)C(=O)O	CC(=C)[C@@H]1CC[C@]2([C@H]1[C@H]3CC[C@@H]4[C@]5(CC[C@@H](C([C@@H]5CC[C@]4([C@@]3(CC2)C)C)(C)C)O)C)C(=O)O
kaempferol	C1=CC(=CC=C1C2=C(C(=O)C3=C(C=C(C=C3O2)O)O)O)O	-
(+)-catechin	C1C(C(OC2=CC(=CC(=C21)O)O)C3=CC(=C(C=C3)O)O)O	C1[C@@H]([C@H](OC2=CC(=CC(=C21)O)O)C3=CC(=C(C=C3)O)O)O
benzoyl paeoniflorin	CC12CC3(C4CC1(C4(C(O2)O3)COC(=O)C5=CC=CC=C5)OC6C(C(C(C(O6)COC(=O)C7=CC=CC=C7)O)O)O)O	C[C@]12C[C@@]3([C@@H]4C[C@@]1([C@@]4([C@H](O2)O3)COC(=O)C5=CC=CC=C5)O[C@@H]6[C@@H]([C@H]([C@@H]([C@H](O6)COC(=O)C7=CC=CC=C7)O)O)O)O
5-[[5-(4-methoxyphenyl)-2-furyl]methylene]barbituric acid	CC1=CC=C(C=C1)C(C(F)(F)F)OS(=O)(=O)C2=CC=C(C=C2)C	-
quercetin	C1=CC(=C(C=C1C2=C(C(=O)C3=C(C=C(C=C3O2)O)O)O)O)O	-
ellagic acid	C1=C2C3=C(C(=C1O)O)OC(=O)C4=CC(=C(C(=C43)OC2=O)O)O	-
paeoniflorgenone	CC12CC(=O)C3CC1(OC(C3COC(=O)C4=CC=CC=C4)O2)O	C[C@@]12CC(=O)[C@H]3C[C@@]1(O[C@H]([C@H]3COC(=O)C4=CC=CC=C4)O2)O
paeoniflorin	CC12CC3(C4CC1(C4(C(O2)O3)COC(=O)C5=CC=CC=C5)OC6C(C(C(C(O6)CO)O)O)O)O	C[C@]12C[C@]3([C@H]4C[C@]1([C@@]4([C@H](O2)O3)COC(=O)C5=CC=CC=C5)O[C@H]6[C@@H]([C@H]([C@@H]([C@H](O6)CO)O)O)O)O
paeoniflorin_qt	CC12CC3(C4CC1(C4(C(O2)O3)COC(=O)C5=CC=CC=C5)OC6C(C(C(C(O6)CO)O)O)O)O	C[C@]12C[C@@]3([C@H]4C[C@]1([C@@]4([C@H](O2)O3)COC(=O)C5=CC=CC=C5)O[C@H]6C(C(C(C(O6)CO)O)O)O)O
baicalein	C1=CC=C(C=C1)C2=CC(=O)C3=C(O2)C=C(C(=C3O)O)O	-
Baicalin	C1=CC=C(C=C1)C2=CC(=O)C3=C(C(=C(C=C3O2)OC4C(C(C(C(O4)C(=O)O)O)O)O)O)O	C1=CC=C(C=C1)C2=CC(=O)C3=C(C(=C(C=C3O2)O[C@H]4[C@@H]([C@H]([C@@H]([C@H](O4)C(=O)O)O)O)O)O)O
sitosterol	CCC(CCC(C)C1CCC2C1(CCC3C2CC=C4C3(CCC(C4)OC(=O)C)C)C)C(C)C	CC[C@H](CC[C@@H](C)[C@H]1CC[C@@H]2[C@@]1(CC[C@H]3[C@H]2CC=C4[C@@]3(CC[C@@H](C4)OC(=O)C)C)C)C(C)C
Spinasterol	CCC(C=CC(C)C1CCC2C1(CCC3C2=CCC4C3(CCC(C4)O)C)C)C(C)C	CC[C@H](/C=C/[C@@H](C)[C@H]1CC[C@@H]2[C@@]1(CC[C@H]3C2=CC[C@@H]4[C@@]3(CC[C@@H](C4)O)C)C)C(C)C
Stigmasterol	CCC(C=CC(C)C1CCC2C1(CCC3C2CC=C4C3(CCC(C4)O)C)C)C(C)C	CC[C@@H](/C=C/[C@@H](C)[C@H]1CC[C@@H]2[C@@]1(CC[C@H]3[C@H]2CC=C4[C@@]3(CC[C@@H](C4)O)C)C)C(C)C
stigmast-7-en-3-ol	CCC(CCC(C)C1CCC2C1(CCC3C2=CCC4C3(CCC(C4)O)C)C)C(C)C	CC[C@@H](CC[C@@H](C)[C@H]1CC[C@@H]2[C@@]1(CC[C@H]3C2=CC[C@@H]4[C@@]3(CC[C@@H](C4)O)C)C)C(C)C
Albiflorin	CC12CC(C3CC1(C3(C(=O)O2)COC(=O)C4=CC=CC=C4)OC5C(C(C(C(O5)CO)O)O)O)O	C[C@]12C[C@H]([C@@H]3C[C@]1([C@@]3(C(=O)O2)COC(=O)C4=CC=CC=C4)O[C@H]5[C@@H]([C@H]([C@@H]([C@H](O5)CO)O)O)O)O
Paeoniflorigenone	CC12CC(=O)C3CC1(OC(C3COC(=O)C4=CC=CC=C4)O2)O	C[C@]12CC(=O)[C@@H]3C[C@]1(O[C@@H]([C@@H]3COC(=O)C4=CC=CC=C4)O2)O
Ethyl oleate (NF)	CCCCCCCCC=CCCCCCCCC(=O)OCC	CCCCCCCC/C=C\CCCCCCCC(=O)OCC
campest-5-en-3beta-ol	CC(C)C(C)CCC(C)C1CCC2C1(CCC3C2CC=C4C3(CCC(C4)O)C)C	C[C@H](CC[C@@H](C)C(C)C)[C@H]1CC[C@@H]2[C@@]1(CC[C@H]3[C@H]2CC=C4[C@@]3(CC[C@@H](C4)O)C)C
DMPEC	COC1=CC=C(C=C1)CCC2=CC(=O)C3=CC(=C(C=C3O2)OC)OC	-
Norboldine	COC1=C(C=C2CC3C4=C(C2=C1)C(=C(C=C4CCN3)O)OC)O	COC1=C(C=C2C[C@H]3C4=C(C2=C1)C(=C(C=C4CCN3)O)OC)O
C09495	CC1=CCCC23C(O2)C(C4=C(C1)OC=C4C)OC3=O	C/C/1=C\CC[C@@]23[C@@H](O2)[C@H](C4=C(C1)OC=C4C)OC3=O
nubigenol	C1=CC(=CC=C1CC(C(=O)C2=C(C=C(C=C2O)O)O)O)O	-
Boldine	CN1CCC2=CC(=C(C3=C2C1CC4=CC(=C(C=C43)OC)O)OC)O	CN1CCC2=CC(=C(C3=C2[C@@H]1CC4=CC(=C(C=C43)OC)O)OC)O
sitosterol	CCC(CCC(C)C1CCC2C1(CCC3C2CC=C4C3(CCC(C4)O)C)C)C(C)C	CC[C@H](CC[C@@H](C)[C@H]1CC[C@@H]2[C@@]1(CC[C@H]3[C@H]2CC=C4[C@@]3(CCC(C4)O)C)C)C(C)C
berberine	COC1=C(C2=C[N+]3=C(C=C2C=C1)C4=CC5=C(C=C4CC3)OCO5)OC	-
coptisine	C1C[N+]2=C(C=C3C=CC4=C(C3=C2)OCO4)C5=CC6=C(C=C51)OCO6	-
Cryptopin	CN1CCC2=CC(=C(C=C2C(=O)CC3=C(C1)C4=C(C=C3)OCO4)OC)OC	-
Dihydrochelerythrine	CN1CC2=C(C=CC(=C2OC)OC)C3=C1C4=CC5=C(C=C4C=C3)OCO5	-
Dihydrosanguinarine	CN1CC2=C(C=CC3=C2OCO3)C4=C1C5=CC6=C(C=C5C=C4)OCO6	-
sanguinarine	C[N+]1=C2C(=C3C=CC4=C(C3=C1)OCO4)C=CC5=CC6=C(C=C52)OCO6	-
(S)-Scoulerine	COC1=C(C2=C(CC3C4=CC(=C(C=C4CCN3C2)OC)O)C=C1)O	-
Cavidine	CC1C2C3=CC(=C(C=C3CCN2CC4=C1C=CC5=C4OCO5)OC)OC	C[C@@H]1[C@@H]2C3=CC(=C(C=C3CCN2CC4=C1C=CC5=C4OCO5)OC)OC
(R)-Canadine	COC1=C(C2=C(CC3C4=CC5=C(C=C4CCN3C2)OCO5)C=C1)OC	-
Hyndarin	COC1=C(C2=C(CC3C4=CC(=C(C=C4CCN3C2)OC)OC)C=C1)OC	COC1=C(C2=C(C[C@H]3C4=CC(=C(C=C4CCN3C2)OC)OC)C=C1)OC
(-)-alpha-N-methylcanadine	-	-
Capaurine	COC1=C(C2=C(CC3C4=C(C(=C(C=C4CCN3C2)OC)OC)O)C=C1)OC	COC1=C(C2=C(C[C@H]3C4=C(C(=C(C=C4CCN3C2)OC)OC)O)C=C1)OC
Clarkeanidine	COC1=C(C2=C(CCN3C2CC4=C(C3)C(=C(C=C4)OC)O)C=C1)O	COC1=C(C2=C(CCN3[C@H]2CC4=C(C3)C(=C(C=C4)OC)O)C=C1)O
CORYDALINE	CC1C2C3=CC(=C(C=C3CCN2CC4=C1C=CC(=C4OC)OC)OC)OC	C[C@@H]1[C@@H]2C3=CC(=C(C=C3CCN2CC4=C1C=CC(=C4OC)OC)OC)OC
Corydalmine	COC1=C(C=C2C3CC4=C(CN3CCC2=C1)C(=C(C=C4)O)OC)OC	COC1=C(C=C2[C@@H]3CC4=C(CN3CCC2=C1)C(=C(C=C4)O)OC)OC
Corydine	CN1CCC2=CC(=C(C3=C2C1CC4=C3C(=C(C=C4)OC)OC)O)OC	CN1CCC2=CC(=C(C3=C2[C@@H]1CC4=C3C(=C(C=C4)OC)OC)O)OC
18797-79-0	CC12C(CC3=CC4=C(C=C3C1N(CC5=C2C=CC6=C5OCO6)C)OCO4)O	C[C@]12[C@H](CC3=CC4=C(C=C3[C@H]1N(CC5=C2C=CC6=C5OCO6)C)OCO4)O
Corynoloxine	CC12C3CC4=CC5=C(C=C4C1N(C(O3)C6=C2C=CC7=C6OCO7)C)OCO5	C[C@@]12[C@H]3C4=CC5=C(C=C4CC1O[C@H](N3C)C6=C2C=CC7=C6OCO7)OCO5
dehydrocorydaline	CC1=C2C=CC(=C(C2=C[N+]3=C1C4=CC(=C(C=C4CC3)OC)OC)OC)OC	-
Dehydrocorydalmine	COC1=C(C=C2C(=C1)CC[N+]3=C2C=C4C=CC(=C(C4=C3)OC)O)OC	-
(1S,8'R)-6,7-dimethoxy-2-methylspiro[3,4-dihydroisoquinoline-1,7'-6,8-dihydrocyclopenta[g][1,3]benzodioxole]-8'-ol	CN1CCC2=CC(=C(C=C2C13CC4=C(C3O)C5=C(C=C4)OCO5)OC)OC	CN1CCC2=CC(=C(C=C2[C@@]13CC4=C([C@@H]3O)C5=C(C=C4)OCO5)OC)OC
Izoteolin	CN1CCC2=CC(=C(C3=C2C1CC4=CC(=C(C=C43)OC)O)O)OC	CN1CCC2=CC(=C(C3=C2[C@@H]1CC4=CC(=C(C=C43)OC)O)O)OC
isocorybulbine	CC1C2C3=CC(=C(C=C3CCN2CC4=C1C=CC(=C4OC)OC)OC)O	C[C@@H]1[C@@H]2C3=CC(=C(C=C3CCN2CC4=C1C=CC(=C4OC)OC)OC)O
N-methyllaurotetanine	CN1CCC2=CC(=C(C3=C2C1CC4=CC(=C(C=C43)OC)O)OC)OC	CN1CCC2=CC(=C(C3=C2[C@@H]1CC4=CC(=C(C=C43)OC)O)OC)OC
norglaucing	COC1=C(C2=C3C(CC4=CC(=C(C=C42)OC)OC)NCCC3=C1)OC	COC1=C(C2=C3[C@H](CC4=CC(=C(C=C42)OC)OC)NCCC3=C1)OC
pontevedrine	CN1C2=C3C(=CC(=C(C3=C4C=C(C(=CC4=C2)OC)OC)OC)OC)C(=O)C1=O	-
24240-05-9	CN1CCC2=CC3=C(C=C2C(=O)CC4=CC5=C(C=C4C1)OCO5)OCO3	-
saulatine	COC1=C(C2=C(C=C1)C3C(=O)C4=CC(=C(C=C4CCN3C(=O)C2)OC)OC)OC	-
stylopine	C1CN2CC3=C(CC2C4=CC5=C(C=C41)OCO5)C=CC6=C3OCO6	-
ST057701	CN1CCC2=CC(=C(C3=C2C1CC4=CC(=C(C=C43)OC)OC)O)OC	CN1CCC2=CC(=C(C3=C2[C@@H]1CC4=CC(=C(C=C43)OC)OC)O)OC
Stigmasterol	CCC(C=CC(C)C1CCC2C1(CCC3C2CC=C4C3(CCC(C4)O)C)C)C(C)C	CC[C@H](/C=C/[C@@H](C)[C@H]1CC[C@@H]2[C@@]1(CC[C@H]3[C@H]2CC=C4[C@@]3(CC[C@@H](C4)O)C)C)C(C)C
palmatine	COC1=C(C2=C[N+]3=C(C=C2C=C1)C4=CC(=C(C=C4CC3)OC)OC)OC	-
Fumarine	CN1CCC2=CC3=C(C=C2C(=O)CC4=C(C1)C5=C(C=C4)OCO5)OCO3	-
Isocorypalmine	COC1=C(C2=C(CC3C4=CC(=C(C=C4CCN3C2)OC)O)C=C1)OC	COC1=C(C2=C(C[C@H]3C4=CC(=C(C=C4CCN3C2)OC)O)C=C1)OC
bicuculline	CN1CCC2=CC3=C(C=C2C1C4C5=C(C6=C(C=C5)OCO6)C(=O)O4)OCO3	CN1CCC2=CC3=C(C=C2[C@H]1[C@H]4C5=C(C6=C(C=C5)OCO6)C(=O)O4)OCO3
C09367	CN1CCC2=CC3=C(C4=C2C1CC5=C4C(=C(C=C5)OC)O)OCO3	CN1CCC2=CC3=C(C4=C2[C@@H]1CC5=C4C(=C(C=C5)OC)O)OCO3
Inermine	C1C2C(C3=C(O1)C=C(C=C3)O)OC4=CC5=C(C=C24)OCO5	C1[C@@H]2[C@H](C3=C(O1)C=C(C=C3)O)OC4=CC5=C(C=C24)OCO5
DFV	C1C(OC2=C(C1=O)C=CC(=C2)O)C3=CC=C(C=C3)O	C1[C@H](OC2=C(C1=O)C=CC(=C2)O)C3=CC=C(C=C3)O
Glycyrol	CC(=CCC1=C(C2=C(C=C1O)OC(=O)C3=C2OC4=C3C=CC(=C4)O)OC)C	-
Jaranol	COC1=CC(=C2C(=C1)OC(=C(C2=O)OC)C3=CC=C(C=C3)O)O	-
Medicarpin	COC1=CC2=C(C=C1)C3COC4=C(C3O2)C=CC(=C4)O	COC1=CC2=C(C=C1)[C@@H]3COC4=C([C@@H]3O2)C=CC(=C4)O
isorhamnetin	COC1=C(C=CC(=C1)C2=C(C(=O)C3=C(C=C(C=C3O2)O)O)O)O	-
Lupiwighteone	CC(=CCC1=C2C(=C(C=C1O)O)C(=O)C(=CO2)C3=CC=C(C=C3)O)C	-
7-Methoxy-2-methyl isoflavone	CC1=C(C(=O)C2=C(O1)C=C(C=C2)OC)C3=CC=CC=C3	-
formononetin	COC1=CC=C(C=C1)C2=COC3=C(C2=O)C=CC(=C3)O	-
Calycosin	COC1=C(C=C(C=C1)C2=COC3=C(C2=O)C=CC(=C3)O)O	-
naringenin	CC1C(C(C(C(O1)OCC2C(C(C(C(O2)OC3=C(OC4=CC(=CC(=C4C3=O)O)O)C5=CC(=C(C=C5)O)O)O)O)O)O)O)O	C[C@H]1[C@@H]([C@H]([C@H]([C@@H](O1)OC[C@@H]2[C@H]([C@@H]([C@H]([C@@H](O2)OC3=C(OC4=CC(=CC(=C4C3=O)O)O)C5=CC(=C(C=C5)O)O)O)O)O)O)O)O
(2S)-2-[4-hydroxy-3-(3-methylbut-2-enyl)phenyl]-8,8-dimethyl-2,3-dihydropyrano[2,3-f]chromen-4-one	CC(=CCC1=C(C=CC(=C1)C2CC(=O)C3=C(O2)C4=C(C=C3)OC(C=C4)(C)C)O)C	CC(=CCC1=C(C=CC(=C1)[C@@H]2CC(=O)C3=C(O2)C4=C(C=C3)OC(C=C4)(C)C)O)C
glyasperin B	CC(=CCC1=C(C=C2C(=C1O)C(=O)C(CO2)C3=C(C=C(C=C3)O)O)OC)C	-
Glyasperin C	CC(=CCC1=C(C2=C(C=C1O)OCC(C2)C3=C(C=C(C=C3)O)O)OC)C	CC(=CCC1=C(C2=C(C=C1O)OC[C@H](C2)C3=C(C=C(C=C3)O)O)OC)C
Semilicoisoflavone B	CC1(C=CC2=C(O1)C(=CC(=C2)C3=COC4=CC(=CC(=C4C3=O)O)O)O)C	-
Glepidotin A	CC(=CCC1=C2C(=C(C=C1O)O)C(=O)C(=C(O2)C3=CC=CC=C3)O)C	-
Glepidotin B	CC(=CCC1=C2C(=C(C=C1O)O)C(=O)C(C(O2)C3=CC=CC=C3)O)C	CC(=CCC1=C2C(=C(C=C1O)O)C(=O)[C@@H]([C@H](O2)C3=CC=CC=C3)O)C
Phaseolinisoflavan	CC1(C=CC2=C(O1)C=CC(=C2O)C3CC4=C(C=C(C=C4)O)OC3)C	CC1(C=CC2=C(O1)C=CC(=C2O)[C@H]3CC4=C(C=C(C=C4)O)OC3)C
Glypallichalcone	COC1=CC=C(C=C1)C(=O)C=CC2=C(C=C(C=C2)O)OC	COC1=CC=C(C=C1)C(=O)/C=C/C2=C(C=C(C=C2)O)OC
Licochalcone B	COC1=C(C=CC(=C1O)O)C=CC(=O)C2=CC=C(C=C2)O	COC1=C(C=CC(=C1O)O)/C=C/C(=O)C2=CC=C(C=C2)O
Licoricone	CC(=CCC1=C(C=C(C(=C1OC)C2=COC3=C(C2=O)C=CC(=C3)O)O)OC)C	-
Gancaonin A	CC(=CCC1=C(C2=C(C=C1O)OC=C(C2=O)C3=CC=C(C=C3)OC)O)C	-
Gancaonin B	CC(=CCC1=C(C2=C(C=C1O)OC=C(C2=O)C3=CC(=C(C=C3)OC)O)O)C	-
3-(3,4-dihydroxyphenyl)-5,7-dihydroxy-8-(3-methylbut-2-enyl)chromone	CC(=CCC1=C2C(=C(C=C1O)O)C(=O)C(=CO2)C3=CC(=C(C=C3)O)O)C	-
5,7-dihydroxy-3-(4-methoxyphenyl)-8-(3-methylbut-2-enyl)chromone	CC(=CCC1=C2C(=C(C=C1O)O)C(=O)C(=CO2)C3=CC=C(C=C3)OC)C	-
2-(3,4-dihydroxyphenyl)-5,7-dihydroxy-6-(3-methylbut-2-enyl)chromone	CCC(=CCC1=C(C2=C(C=C1O)OC(=CC2=O)C3=CC(=C(C=C3)O)O)O)C	-
Glycyrin	CC(=CCC1=C(C=C2C(=C1OC)C=C(C(=O)O2)C3=C(C=C(C=C3)O)O)OC)C	-
Licoisoflavone	CC(=CCC1=C(C=CC(=C1O)C2=COC3=CC(=CC(=C3C2=O)O)O)O)C	-
Licoisoflavone B	CC1(C=CC2=C(O1)C=CC(=C2O)C3=COC4=CC(=CC(=C4C3=O)O)O)C	-
licoisoflavanone	CC1(C=CC2=C(O1)C=CC(=C2O)C3COC4=CC(=CC(=C4C3=O)O)O)C	-
shinpterocarpin	CC1(C=CC2=C(O1)C=CC3=C2OCC4C3OC5=C4C=CC(=C5)O)C	CC1(C=CC2=C(O1)C=CC3=C2OC[C@@H]4[C@H]3OC5=C4C=CC(=C5)O)C
liquiritin	C1C(OC2=C(C1=O)C=CC(=C2)O)C3=CC=C(C=C3)OC4C(C(C(C(O4)CO)O)O)O	C1[C@H](OC2=C(C1=O)C=CC(=C2)O)C3=CC=C(C=C3)O[C@H]4[C@@H]([C@H]([C@@H]([C@H](O4)CO)O)O)O
licopyranocoumarin	CC1(CCC2=C(O1)C=C3C(=C2OC)C=C(C(=O)O3)C4=C(C=C(C=C4)O)O)CO	-
3,22-Dihydroxy-11-oxo-delta(12)-oleanene-27-alpha-methoxycarbonyl-29-oic acid	CC1(C2CCC3(C(C2(CCC1O)C)C(=O)C=C4C3(CCC5(C4CC6(CC5OC6=O)C)C)C(=O)OC)C)C	C[C@]12CC[C@@H](C([C@@H]1CC[C@@]3([C@@H]2C(=O)C=C4[C@]3(CC[C@@]5([C@H]4C[C@@]6(C[C@H]5OC6=O)C)C)C(=O)OC)C)(C)C)O
Glabridin	CC1(C=CC2=C(O1)C=CC3=C2OCC(C3)C4=C(C=C(C=C4)O)O)C	CC1(C=CC2=C(O1)C=CC3=C2OC[C@H](C3)C4=C(C=C(C=C4)O)O)C
Glabranin	CC(=CCC1=C2C(=C(C=C1O)O)C(=O)CC(O2)C3=CC=CC=C3)C	CC(=CCC1=C2C(=C(C=C1O)O)C(=O)C[C@H](O2)C3=CC=CC=C3)C
Glabrene	CC1(C=CC2=C(C=CC(=C2O1)C3=CC4=C(C=C(C=C4)O)OC3)O)C	-
Glabrone	CC1(C=CC2=C(O1)C=CC(=C2O)C3=COC4=C(C3=O)C=CC(=C4)O)C	-
glycyroside	COC1=CC=C(C=C1)C2=COC3=C(C2=O)C=CC(=C3)OC4C(C(C(C(O4)CO)O)O)OC5C(C(CO5)(CO)O)O	-
Sigmoidin-B	CC(=CCC1=C(C(=CC(=C1)C2CC(=O)C3=C(C=C(C=C3O2)O)O)O)O)C	CC(=CCC1=C(C(=CC(=C1)[C@@H]2CC(=O)C3=C(C=C(C=C3O2)O)O)O)O)C
(2R)-7-hydroxy-2-(4-hydroxyphenyl)chroman-4-one	C1C(OC2=C(C1=O)C=CC(=C2)O)C3=CC=C(C=C3)O	C1[C@H](OC2=C(C1=O)C=CC(=C2)O)C3=CC=C(C=C3)O
(2S)-7-hydroxy-2-(4-hydroxyphenyl)-8-(3-methylbut-2-enyl)chroman-4-one	CC(=CCC1=C(C=CC2=C1OC(CC2=O)C3=CC=C(C=C3)O)O)C	CC(=CCC1=C(C=CC2=C1O[C@@H](CC2=O)C3=CC=C(C=C3)O)O)C
Isoglycyrol	CC1(CCC2=C(O1)C=C3C(=C2OC)C4=C(C5=C(O4)C=C(C=C5)O)C(=O)O3)C	-
Isolicoflavonol	CC(=CCC1=C(C=CC(=C1)C2=C(C(=O)C3=C(C=C(C=C3O2)O)O)O)O)C	-
Quercetin der.	COC1=C(C=CC(=C1)C2=C(C(=O)C3=C(C=C(C=C3O2)O)O)OC)O	-
licochalcone a	CC(C)(C=C)C1=C(C=C(C(=C1)C=CC(=O)C2=CC=C(C=C2)O)OC)O	CC(C)(C=C)C1=C(C=C(C(=C1)/C=C/C(=O)C2=CC=C(C=C2)O)OC)O
7-Acetoxy-2-methylisoflavone	CC1=C(C(=O)C2=C(O1)C=C(C=C2)OC(=O)C)C3=CC=CC=C3	-
gadelaidic acid	CCCCCCCCCCC=CCCCCCCCC(=O)O	-
Vestitol	COC1=CC(=C(C=C1)C2CC3=C(C=C(C=C3)O)OC2)O	COC1=CC(=C(C=C1)[C@@H]2CC3=C(C=C(C=C3)O)OC2)O
Gancaonin G	CC(=CCC1=C(C=C2C(=C1O)C(=O)C(=CO2)C3=CC=C(C=C3)O)OC)C	-
Gancaonin H	CC(=CCC1=C(C2=C(C=C1O)OC=C(C2=O)C3=CC4=C(C(=C3)O)OC(C=C4)(C)C)O)C	-
Chryseriol	COC1=C(C=CC(=C1)C2=CC(=O)C3=C(C=C(C=C3O2)O)O)O	-
8-Isopentenyl-kaempferol	CC(=CCC1=C2C(=C(C=C1O)O)C(=O)C(=C(O2)C3=CC=C(C=C3)O)O)C	-
Khell	CC1=CC(=O)C2=C(C3=C(C(=C2O1)OC)OC=C3)OC	-
Resivit	C1=CC(=C(C=C1C2C(C(C3=C(C=C(C=C3O2)O)O)O)O)O)O	-
rosenonolactone	CC1(CCC2(C(C1)C(=O)CC3C24CCCC3(C(=O)O4)C)C)C=C	C[C@]1(CC[C@@]2([C@@H](C1)C(=O)C[C@@H]3[C@]24CCC[C@@]3(C(=O)O4)C)C)C=C
stigmasterol glucoside_qt	CCC(C=CC(C)C1CCC2C1(CCC3C2CC=C4C3(CCC(C4)OC5C(C(C(C(O5)CO)O)O)O)C)C)C(C)C	CC[C@H](/C=C/[C@@H](C)[C@H]1CC[C@@H]2[C@@]1(CC[C@H]3[C@H]2CC=C4[C@@]3(CC[C@@H](C4)O[C@H]5[C@@H]([C@H]([C@@H]([C@H](O5)CO)O)O)O)C)C)C(C)C
luteolin	C1=CC(=C(C=C1C2=CC(=O)C3=C(C=C(C=C3O2)O)O)O)O	-
poriferast-5-en-3beta-ol	CCC(CCC(C)C1CCC2C1(CCC3C2CC=C4C3(CCC(C4)O)C)C)C(C)C	CC[C@H](CC[C@@H](C)[C@H]1CC[C@@H]2[C@@]1(CC[C@H]3[C@H]2CC=C4[C@@]3(CC[C@@H](C4)O)C)C)C(C)C
Flavoxanthin	CC1=CC(CC(C1C=CC(=CC=CC(=CC=CC=C(C)C=CC=C(C)C2C=C3C(CC(CC3(O2)C)O)(C)C)C)C)(C)C)O	CC1=C[C@@H](CC([C@H]1/C=C/C(=C/C=C/C(=C/C=C/C=C(\C)/C=C/C=C(\C)/[C@H]2C=C3[C@](O2)(C[C@H](CC3(C)C)O)C)/C)/C)(C)C)O
Phytoene	CC(=CCCC(=CCCC(=CCCC(=CC=CC=C(C)CCC=C(C)CCC=C(C)CCC=C(C)C)C)C)C)C	CC(=CCC/C(=C/CC/C(=C/CC/C(=C/C=C/C=C(/CC/C=C(/CC/C=C(/CCC=C(C)C)\C)\C)\C)/C)/C)/C)C
phytofluene	CC(=CCCC(=CCCC(=CCCC(=CC=CC=C(C)C=CC=C(C)CCC=C(C)CCC=C(C)C)C)C)C)C	CC(=CCC/C(=C/CC/C(=C/CC/C(=C/C=C/C=C(\C)/C=C/C=C(\C)/CC/C=C(\C)/CCC=C(C)C)/C)/C)/C)C
Pyrethrin II	CC1=C(C(=O)CC1OC(=O)C2C(C2(C)C)C=C(C)C(=O)OC)CC=CC=C	CC1=C(C(=O)C[C@@H]1OC(=O)[C@@H]2[C@H](C2(C)C)/C=C(\C)/C(=O)OC)C/C=C\C=C
6-Hydroxykaempferol	C1=CC(=CC=C1C2=C(C(=O)C3=C(O2)C=C(C(=C3O)O)O)O)O	-
6-Hydroxynaringenin	C1C(OC2=C(C1=O)C(=C(C(=C2)O)O)O)C3=CC=C(C=C3)O	C1[C@H](OC2=C(C1=O)C(=C(C(=C2)O)O)O)C3=CC=C(C=C3)O
quercetagetin	C1=CC(=C(C=C1C2=C(C(=O)C3=C(O2)C=C(C(=C3O)O)O)O)O)O	-
beta-carotene	CC1=C(C(CCC1)(C)C)C=CC(=CC=CC(=CC=CC=C(C)C=CC=C(C)C=CC2=C(CCCC2(C)C)C)C)C	CC1=C(C(CCC1)(C)C)/C=C/C(=C/C=C/C(=C/C=C/C=C(/C=C/C=C(/C=C/C2=C(CCCC2(C)C)C)\C)\C)/C)/C
CLR	CC(C)CCCC(C)C1CCC2C1(CCC3C2CC=C4C3(CCC(C4)O)C)C	C[C@H](CCCC(C)C)[C@H]1CC[C@@H]2[C@@]1(CC[C@H]3[C@H]2CC=C4[C@@]3(CC[C@@H](C4)O)C)C
Marmin	CC(=CCOC1=CC2=C(C=C1)C=CC(=O)O2)CCC(C(C)(C)O)O	C/C(=C\COC1=CC2=C(C=C1)C=CC(=O)O2)/CC[C@H](C(C)(C)O)O
Hesperetin	COC1=C(C=C(C=C1)C2CC(=O)C3=C(C=C(C=C3O2)O)O)O	COC1=C(C=C(C=C1)[C@@H]2CC(=O)C3=C(C=C(C=C3O2)O)O)O
naringenin	C1C(OC2=CC(=CC(=C2C1=O)O)O)C3=CC=C(C=C3)O	C1[C@H](OC2=CC(=CC(=C2C1=O)O)O)C3=CC=C(C=C3)O
nobiletin	COC1=C(C=C(C=C1)C2=CC(=O)C3=C(O2)C(=C(C(=C3OC)OC)OC)OC)OC	-
